# Supplementary material
Source: HighWire-hosted journal article supplement (http://www.cmaj.ca/highwire/filestream/58416/field_highwire_adjunct_files/0/weissman.pdf)
Supplement: weissman.pdf [file weissman.pdf]

**Appendix: Summary of clinical trials evaluating the accuracy of multiple-slice spiral computed tomographic angiography (MSCT)**

| Study report          | No. of patients | Vessel sizes, mm | No. of segments examined | Analysis*       | Portion analyzable, % | MSCT slices per rotation speed, s | Subjects' risk of CAD | PPV | NPV | Sensitivity | Specificity |
|-----------------------|-----------------|------------------|--------------------------|-----------------|-----------------------|-----------------------------------|-----------------------|-----|-----|-------------|-------------|
| Nieman et al 2002†    | 53              | > 2.0            | NA                       | Patient         | NR                    | 16/0.42                           | High                  | 80  | 97  | 95          | 86          |
| Ropers et al 2003‡    | 77              | > 1.5            | NA                       | Patient         | 88                    | 16/0.42                           | High                  | 81  | 82  | 85          | 78          |
| Hoffmann et al 2004§  | 33              | All              | 530                      | Pt, segment     | 82                    | 16/0.42                           | High                  | 90  | 75  | 86          | 82          |
| 2005¶                 | 103             | All              | 1384                     | Pt, segment     | < 94                  | 16/0.42                           | Mod-high              | 90  | 95  | 97          | 87          |
| Kuettner et al 2005** | 72              | All              | 936                      | Segment         | > 91                  | 16/0.37                           | High                  | 87  | 97  | 82          | 98          |
| Leschka et al 2005††  | 67              | • 1.5            | 1005                     | Pt, vessel, seg | 100                   | 64/NA                             | Mod-high              | 87  | 99  | 94          | 97          |
| Mollet et al 2005‡‡   | 51              | > 2.0            | 610                      | Pt, vessel, seg | NR                    | 16/0.37                           | Low-mod               | 91  | 100 | 100         | 85          |
| Raff et al 2005§§     | 70              | All              | 1065                     | Pt, vessel, seg | 83                    | 64/0.33                           | Mod-high              | 93  | 93  | 90          | 95          |

Note: CAD = coronary-artery disease, PPV = positive predictive value, NPV = negative predictive value, NA = not available, NR = not reported, Pt = patient, seg = segment of vessel, mod = moderate.

\*These trials compared the accuracy of MSCT angiography with invasive coronary angiography for the detection of severe coronary lesions. Some study analyses were based on numbers of artery segments (seg) that held a lesion (e.g., the Raff group's study involving 70 patients based its analysis on the results from 1065 segments); others, on numbers of entire coronary vessels containing a lesion (e.g., the left anterior descending artery); and still others (probably the most stringent strategy), on numbers of patients (Pt) having one or more vascular lesions.

†*Circulation* 2002;106:2051-4.

‡*Circulation* 2003;107:664-6.

§*Circulation* 2004;110:2638-43.

¶*JAMA* 2005;293:2471-8.

\*\**J Am Coll Cardiol* 2005;45:123-7.

††*Eur Heart J* 2005;15:1482-7.

‡‡*J Am Coll Cardiol* 2005;45:128-32.

§§*J Am Coll Cardiol* 2005;46:552-7.
